# Supplementary material for: Dimethyltin(IV) cation induced amide deprotonation of aspartic acid containing dipeptides †
Source: Royal Society of Chemistry journal article supplement (doi:10.1039/a909741d), 2000-01-01
Supplement: a909741d.doc [file a909741d.doc]

**Supporting information for**

**Dimethyltin(IV)2+ cation induced amide deprotonation of aspartic acid containing dipeptides**

Attila Jancsó, Bernard Henry, Patrice Rubini, György Vankó and Tamás Gajda

**Figure S1.** Part of the 1H-1H COSY spectrum in the Asp-Gly – dimethyltin(IV) system in H2O. [L]=0.15 mol.dm–3; [M]=0.1125 mol.dm–3; pH=6.82.

**Figure S2.** Part of the 1H NMR spectra of the dimethyltin(IV)–Gly-Asp (**A**) and –Asp-Gly (**B**) systems in H2O. [L]=0.01 mol.dm–3; [M]=0.005 mol.dm–3; pH=9.88 (A) and 9.83 (B).
